# Supplementary material for: The nanoparticle-facilitated autophagy inhibition of cancer stem cells for improved chemotherapeutic effects on glioblastomas
Source: Royal Society of Chemistry journal article supplement (doi:10.1039/c8tb03165g), 2019-01-01
Supplement: c8tb03165g1.pdf [file c8tb03165g1.pdf]

## Supporting Information

### **Nanoparticle-facilitated autophagy inhibition of cancer stem cells for improved chemotherapeutic effects on glioblastoma**

Lu Lu<sup>a</sup>, Xinkun Shen<sup>a</sup>, Bailong Tao<sup>a</sup>, Chuanchuan Lin<sup>a</sup>, Ke Li<sup>a</sup>, Zhong Luo<sup>\*b</sup>, Kaiyong Cai<sup>\*a</sup>

a. Ministry of Education College of Bioengineering, Chongqing University, Chongqing 400044, China.

b. School of Life Science, Chongqing University, Chongqing 400044, China.

\* Corresponding author: Prof. Dr. Zhong Luo and Prof. Dr. Kaiyong Cai

College of Bioengineering

Chongqing University,

Chongqing 400044,

China

Tel: +86-23-65111802

Fax: +86-23-65102877

E-mail: [luozhong918@cqu.edu.cn](mailto:luozhong918@cqu.edu.cn), [kaiyong\\_cai@cqu.edu.cn](mailto:kaiyong_cai@cqu.edu.cn)

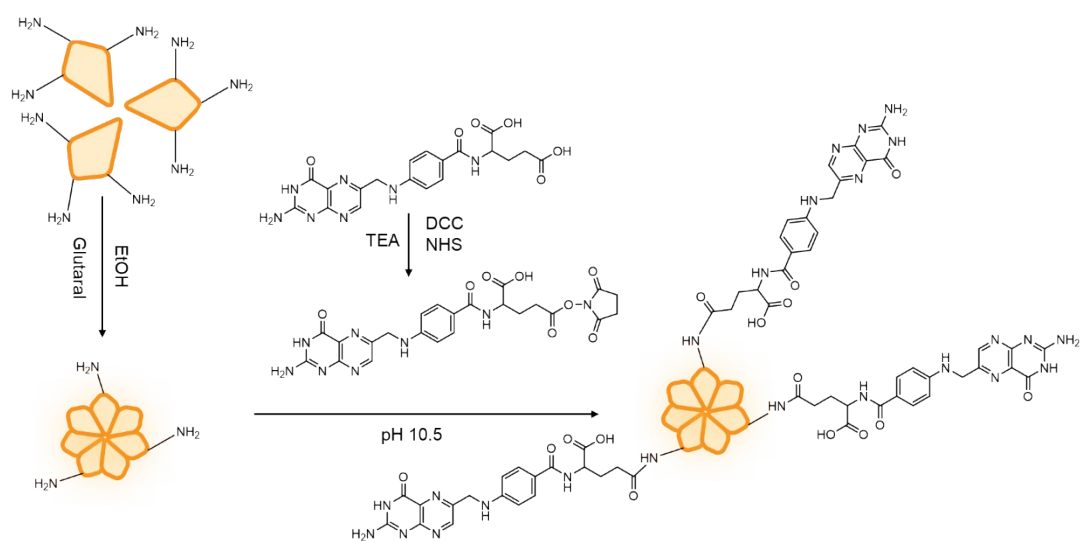

**Scheme S1.** Chemical synthetic route of FA-grafted BSA nanoparticles.

**Table S1.** Short hairpin RNA sequences used for lentiviral construction.

| Vector   | Sequence              |
|----------|-----------------------|
| siNT     | TTCTCCGAACGTGTCACGT   |
| siATG5-1 | GCAGTGGCTGAGTGAACATCT |
| siATG5-2 | CCTTTCATTCAGAAGCTGTTT |

**Table S2.** Primers used for qRT-PCR in this study.

| Gene           | Forward primer (5' to 3') | Reverse primer (5' to 3') |
|----------------|---------------------------|---------------------------|
| NANOG          | AGGCAAACAACCCACTTCT       | TCACACCATTGCTATTCTTCG     |
| POU5F1         | GCAGCGACTATGCACAACGA      | CCAGAGTGGTGACGGAGACA      |
| SOX2           | CAGCCCATGCACCGCTACGACG    | CACCGAACCCATGGAGCCAAGA    |
| $\beta$ -Actin | TTGCGTTACACCCTTTCTTG      | GCCACCTTCACCGTTCCAGTTT    |

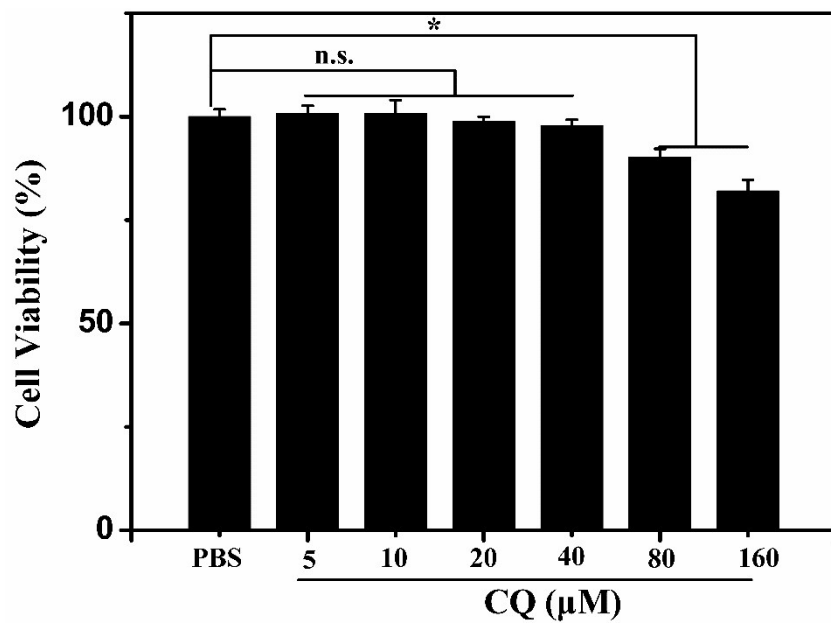

**Fig. S1.** MTT analysis of T98G cell viability after 24 h treatment with CQ at different concentrations. Data are shown as means  $\pm$  s.d. ( $n = 6$ ). n. s. means no significance, \* $p < 0.05$ .

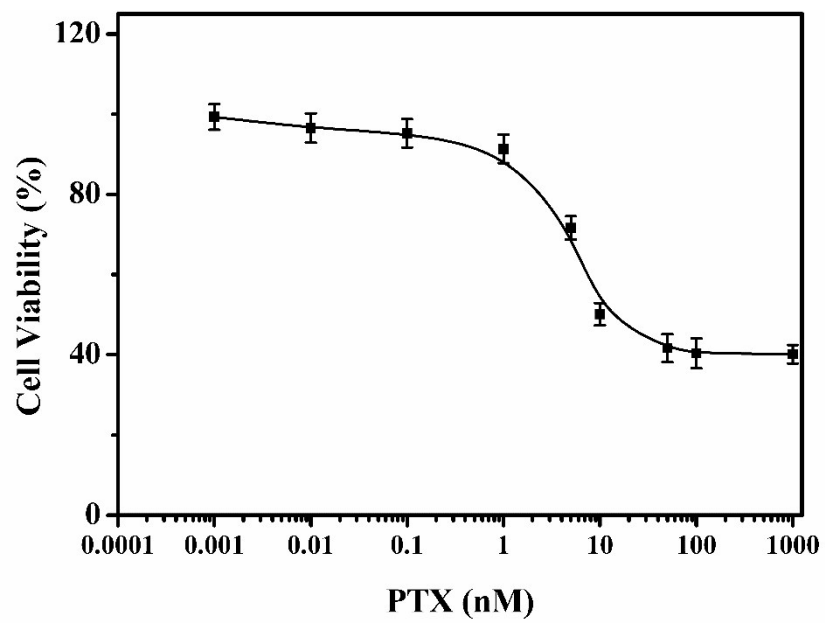

**Fig. S2.** Cytotoxicity profile of PTX treatment to T98G cells after culture for 24 h.

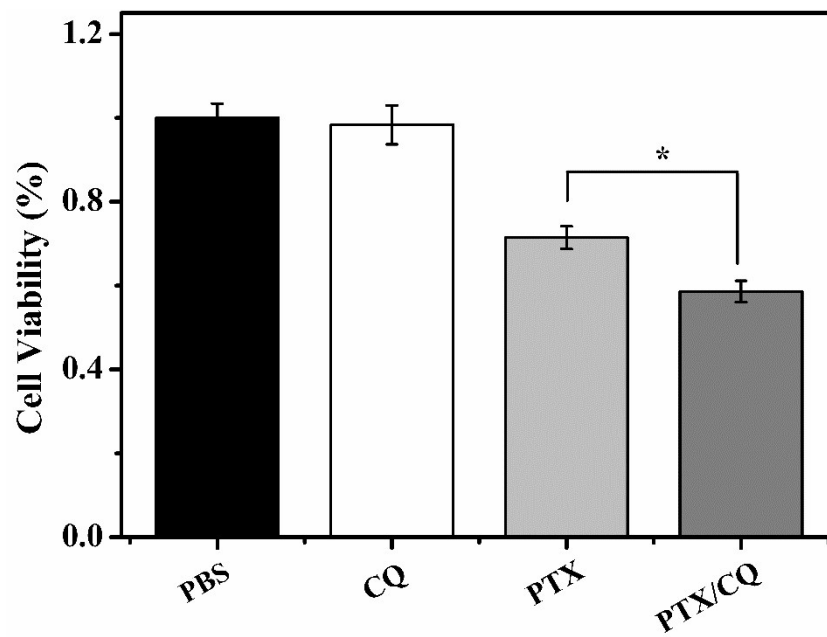

**Fig. S3.** MTT analyses of the viability of T98G cells with different drug treatment for 24 h. The concentration of CQ was 20  $\mu$ M; and the concentration of PTX was 10 nM. Data are shown as means  $\pm$  s.d. (n = 6). \*p < 0.05.

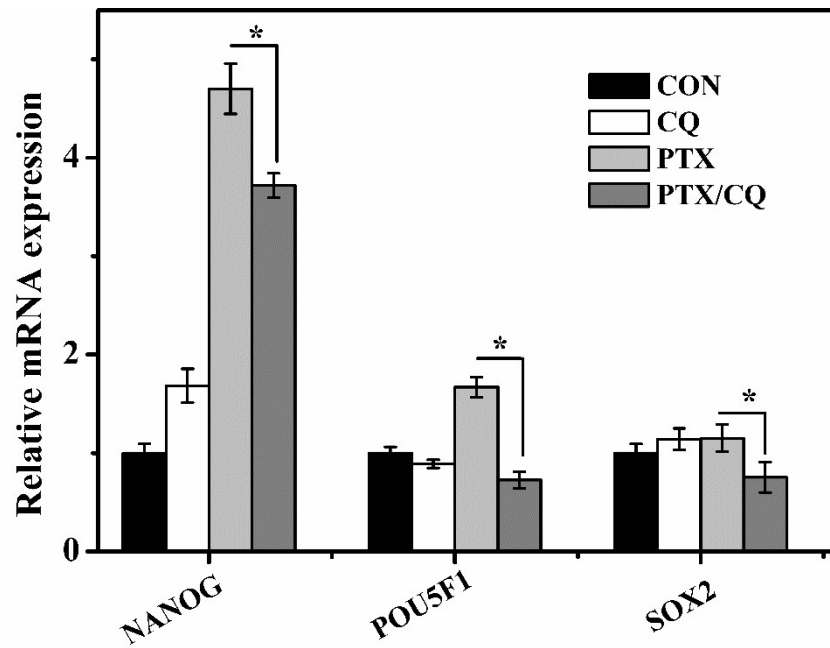

**Fig. S4.** Quantitative PCR assay for mRNA levels of NANOG, POU5F1 and SOX2 in T98G cells with different treatments for 3 days, The concentration of CQ was 20  $\mu$ M; and the concentration of PTX was 10 nM.  $\beta$ -Actin was used as control, n = 4, \*p < 0.05.



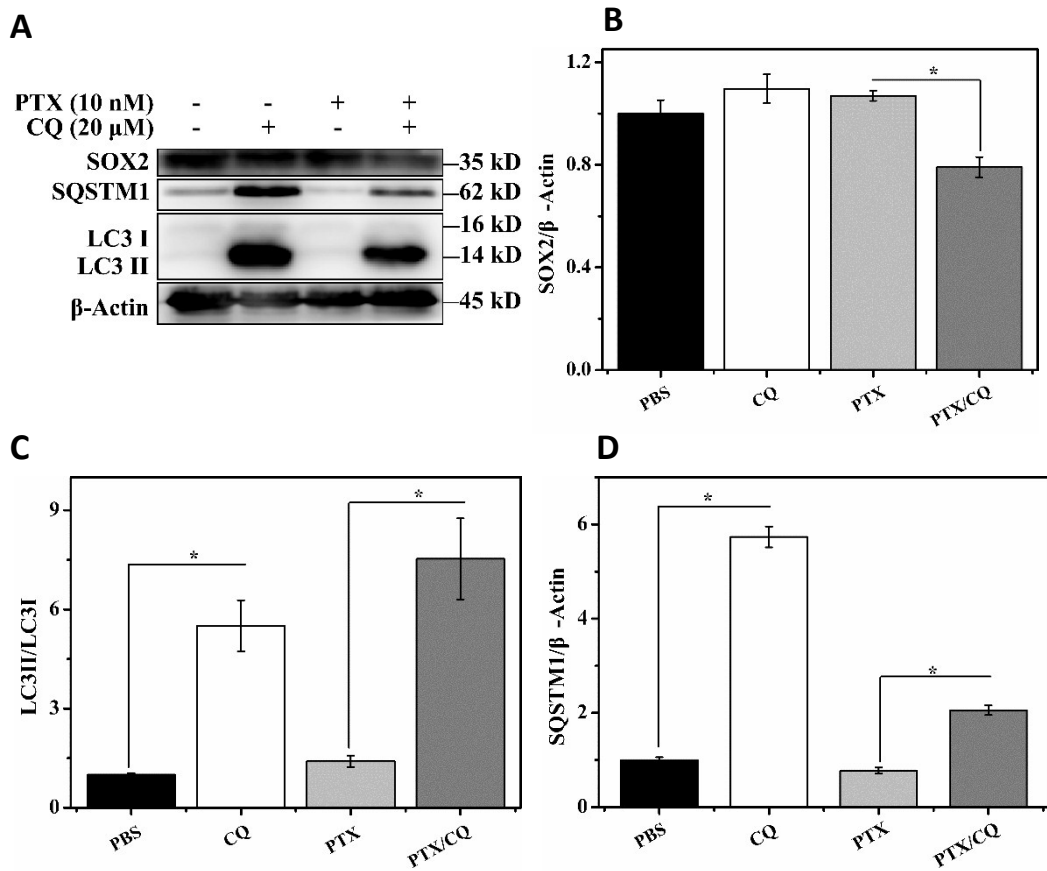

**Fig. S5.** (A) Protein expression of SOX2, LC3 and SQSTM1 in T98G cells after incubation with CQ, PTX and PTX/CQ for 72 h, representative Western blots are presented. (B) Western blot densitometric analysis on the expression levels of SOX2 in T98G cells with different treatments for 72 h.  $\beta$ -Actin was used as control,  $n = 3$ ,  $*p < 0.05$ . (C) Western blot densitometric analysis on the expression levels of LC3II in T98G cells with different treatments for 72 h. LC3I was used as control,  $n = 3$ ,  $*p < 0.05$ . (D) Western blot densitometric analysis on the expression levels of SQSTM1 in T98G cells with different treatments for 72 h.  $\beta$ -Actin was used as control,  $n = 3$ ,  $*p < 0.05$ .

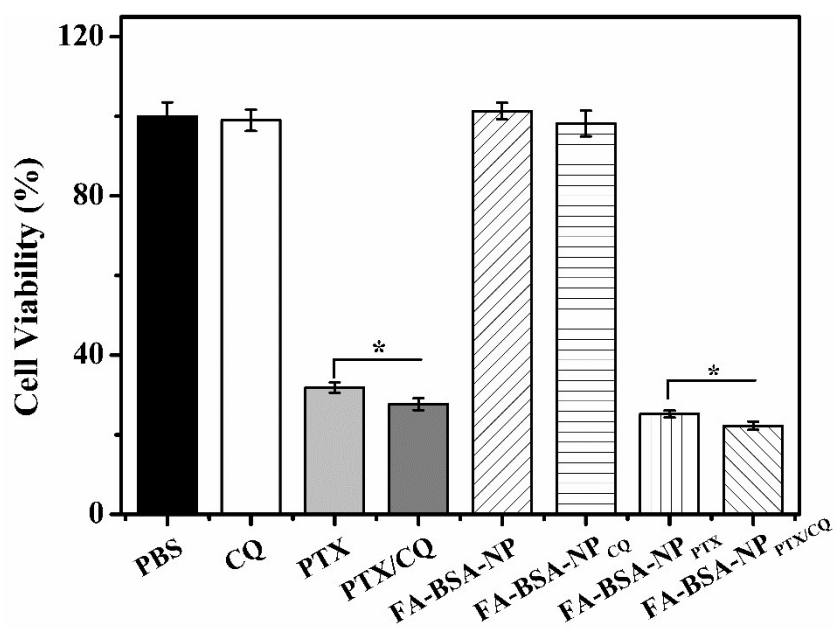

**Fig. S6.** MTT analysis of the viability of LN229 cells after treatment with different formulations for 3 days. Cell viability was normalized to that of PBS-treated cells which served as the indicator of 100% cell viability. Data are shown as means  $\pm$  s.d. (n = 6). The concentration of CQ and PTX in the cell culture was equivalent to 20  $\mu$ M or 10 nM, respectively. \*p < 0.05.
